# Supplementary material
Source: PubMed Central journal article supplement (PMC3361400)
Supplement: 1111122109_pnas.201111122SI.pdf [file 1111122109_pnas.201111122SI.pdf]

# Supporting Information

Warmuth et al. 10.1073/pnas.1111122109

## SI Materials and Methods

**Model Prediction of Heterozygosities of Wild and Domesticated Horses.** This section describes the analytic model predicting pairwise within- and between-population homozygosities. The corresponding heterozygosities are calculated as  $H = 1 - F$ , where  $H$  is the heterozygosity and  $F$  is the homozygosity. Let  $F_{ij}^{ww}(t, \mu)$  denote the expected homozygosity of a pair of alleles drawn randomly from two wild horses in demes  $i$  and  $j$  in generation  $t$ , under the infinite-alleles model with mutation probability  $\mu$  per locus and generation (i.e., when each mutation gives a new allelic variant). Given the migration matrix  $M_{ik}^w(t)$  (the probability that, in generation  $t$ , an individual in deme  $k$  emigrates to deme  $i$ ) and the population size  $N_i^w(t)$  of deme  $i$  in generation  $t$ , we can write a recursion for  $F_{ij}^{ww}(t, \mu)$ ,

$$F_{ij}^{ww}(t+1) = (1-\mu)^2 \sum_{kl} M_{ik}^w M_{jl}^w \left[ \frac{\delta_{kl}}{2N_k^w} + \left(1 - \frac{\delta_{kl}}{2N_k^w}\right) F_{kl}^{ww} \right], \quad [\text{S1}]$$

where the right-hand side is evaluated in generation  $t$ , and  $\delta_{kl} = 1$  if  $k = l$  and 0 otherwise.

When comparing two domesticated horses, or one wild and one domesticated horse, we describe the effect of migration and colonization in two stages. The homozygosity after migration in generation  $t$  is

$$\tilde{F}_{ij}^{dd}(t) = (1-\mu)^2 \sum_{kl} M_{ik}^d M_{jl}^d \left[ \frac{\delta_{kl}}{2N_k^d} + \left(1 - \frac{\delta_{kl}}{2N_k^d}\right) F_{kl}^{dd} \right] \quad [\text{S2}]$$

$$\tilde{F}_{ij}^{wd}(t) = (1-\mu)^2 \sum_{kl} M_{ik}^w M_{jl}^d F_{kl}^{wd}.$$

Here  $N_i^d$  is the effective population size in the domesticated horse population of deme  $i$ , and  $M_{ij}^d$  is the migration rate between the domesticated populations in demes  $i$  and  $j$ . The effect of establishment of newly colonized demes on the homozygosity of two domesticated horses is described by the following relations:

When  $i = j$  and  $i$  is being colonized from deme  $k_i$ ,

$$F_{ij}^{dd}(t+1) = \frac{(1-\mu)^2}{2c_d K_d} + \left(1 - \frac{1}{2c_d K_d}\right) \times \left[ q^2 \tilde{F}_{k_i k_i}^{dd} + 2q(1-q) \tilde{F}_{k_i i}^{wd} + (1-q)^2 \tilde{F}_{ii}^{ww} \right]. \quad [\text{S3}]$$

When  $i$  is being colonized from deme  $k_i$ , and  $j$  is already colonized,

$$F_{ij}^{dd}(t+1) = q \tilde{F}_{k_i j}^{dd} + (1-q) \tilde{F}_{ij}^{wd}. \quad [\text{S4}]$$

When  $i \neq j$  and both demes are being colonized (from demes  $k_i$  and  $k_j$ , respectively),

$$F_{ij}^{dd}(t+1) = q^2 \tilde{F}_{k_i k_j}^{dd} + q(1-q) (\tilde{F}_{k_i j}^{wd} + \tilde{F}_{j k_i}^{wd}) + (1-q)^2 \tilde{F}_{ij}^{ww}. \quad [\text{S5}]$$

Otherwise,  $F_{ij}^{dd}(t+1) = \tilde{F}_{ij}^{dd}(t+1)$ .

The corresponding relation for the homozygosity of a wild and a domesticated horse is

$$F_{ij}^{wd}(t+1) = \begin{cases} q \tilde{F}_{ik_j}^{wd} + (1-q) \tilde{F}_{ij}^{ww} & \text{when deme } j \text{ is being colonized} \\ \tilde{F}_{ij}^{wd} & \text{otherwise.} \end{cases} \quad [\text{S6}]$$

When the first domestic deme is colonized, we take  $q = 0$ , because in this case all horses must come from the local wild population.

To calculate the corresponding recursions for the stepwise mutation model (SMM) of microsatellite loci (1, 2), let  $t_{ij}$  be the number of generations to the most recent common ancestor of a pair of individuals from demes  $i$  and  $j$ . Under the SMM model the difference  $\Delta$  in repeat count of two alleles is then the sum of  $2t_{ij}$  independent identically distributed random variables, each of which is  $-1$ ,  $0$ , or  $1$  with probabilities  $\mu/2$ ,  $1-\mu$ , and  $\mu/2$ , respectively. Hence, the characteristic function for the difference in repeat number,  $\langle e^{i\omega\Delta} \rangle$ , is  $(1-\mu + \mu \cos \omega)^{2t_{ij}}$ . It follows that the homozygosity under the SMM model is

$$F_{ij}^{\text{SMM}}(t, \mu) = \frac{1}{2\pi} \int_0^{2\pi} \langle (1-\mu + \mu \cos \omega)^{2t_{ij}} \rangle d\omega, \quad [\text{S7}]$$

where the angular brackets denote expectation over gene genealogies (3). Thus, it follows that the SMM homozygosity is related to the infinite-alleles homozygosity as

$$F_{ij}^{\text{SMM}}(t, \mu) = \frac{1}{2\pi} \int_0^{2\pi} F_{ij}(t, \mu(1-\cos \omega)) d\omega, \quad [\text{S8}]$$

where  $F_{ij}$  is any of  $F_{ij}^{ww}$ ,  $F_{ij}^{wd}$ , or  $F_{ij}^{dd}$ . We used the following numerical approximation to evaluate the integral:

$$F_{ij}^{\text{SMM}}(t, \mu) \approx \frac{1}{n} \sum_{k=1}^n F_{ij} \left( t, \mu \left( 1 - \cos \frac{\pi(k-1/2)}{n} \right) \right). \quad [\text{S9}]$$

This approximation is very accurate when  $n$  is large enough that the probability of observing a difference of more than  $n$  repeat units can be ignored. Using  $n = 50$  was enough to obtain machine precision for the parameters used in this study.

**Validation of the Statistical Method.** Because of the need to efficiently generate sample predictions, we could not use a fully stochastic method. We therefore approximated the stochastic samples by adding noise to the matrix of expected predicted homozygosities within and between populations. The noise is independent between parameter combinations but matrix elements within the matrix are correlated. We estimated this correlation structure using 10,000 bootstrap samples of the real data and generated the noise by sampling from the multivariate Gaussian distribution with these correlations and zero mean.

To validate our approach, we implemented a fully stochastic version of the part of the model describing the wild progenitors of domestic horses in our model and generated a synthetic dataset with the same number of loci, sample sizes, and population locations as in the real data, for parameter values  $t = 10,000$ ,  $r = 0.05$ ,  $cK = 20$ ,  $mK = 100$ ,  $K = 50,000$ , and  $K_0 = 1,000$ . We then performed the same analysis as for the full model: We estimated the correlations between matrix elements of pairwise homozygosity in the synthetic dataset, using 10,000 bootstrap iterations; ran a uniform parameter sweep of the parameter space, generating pairwise homozygosities from the predicted expected values (calculated using  $F_{ij}^{ww}$  values in the previous section, using the mutation rate  $\mu = 1.5 \cdot 10^{-4}$ ) and the correlated noise; and finally performed the same rejection sampling and GLM-ABC analyses using the ABCtoolbox (4) as for the full model (*Materials and Methods* in main text). Fig. S5 shows the resulting marginal distributions of parameter values from the rejection stage, the posterior distribution estimated by GLM-ABC, and the true parameter values. Some differences between true and fitted parameters are expected due to the limited amount of genetic data (26 nuclear microsatellite markers in 12 populations);

nevertheless, for most parameters the mode of the distribution is quite close to the true value of the parameter (except where a large

range of values are compatible with the generated data, for example for the carrying capacity  $K$ ).

1. Kimura M, Ohta T (1975) Distribution of allelic frequencies in a finite population under stepwise production of neutral alleles. *Proc Natl Acad Sci USA* 72:2761–2764.
2. Kimura M, Ohta T (1978) Stepwise mutation model and distribution of allelic frequencies in a finite population. *Proc Natl Acad Sci USA* 75:2868–2872.
3. Eriksson A, Manica A (2011) Detecting and removing ascertainment bias in microsatellites from the HGDP-CEPH panel. *G3* 1:479–488.
4. Wegmann D, Leuenberger C, Neuenschwander S, Excoffier L (2010) ABCtoolbox: A versatile toolkit for approximate Bayesian computations. *BMC Bioinformatics* 11:116.

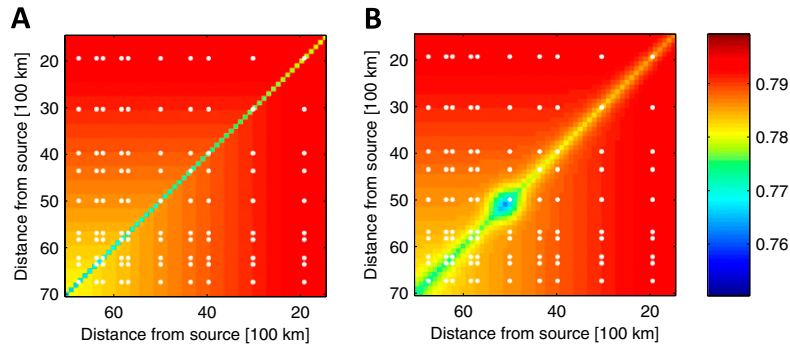

**Fig. S1.** Within- and between-population heterozygosity in wild and domestic horses as a function of distance from the origin of the expansion in East Asia. (A) Between-population heterozygosity (off-diagonal elements) corresponds to a pattern of isolation-by-distance (IBD). The decline in within-population heterozygosity (on-diagonal elements) is relatively weak. (B) The demic component in the spread of horse domestication accentuated the east-to-west decline in within-population diversity (on diagonal), whereas the extensive incorporation of wild horses into domestic stock means that the original pattern of IBD (off diagonal) has been preserved in modern domestic horses from the steppes. The dip in within-population heterozygosity around 5,000 km reflects the strong bottleneck associated with the initial domestication of horses in the western steppe.

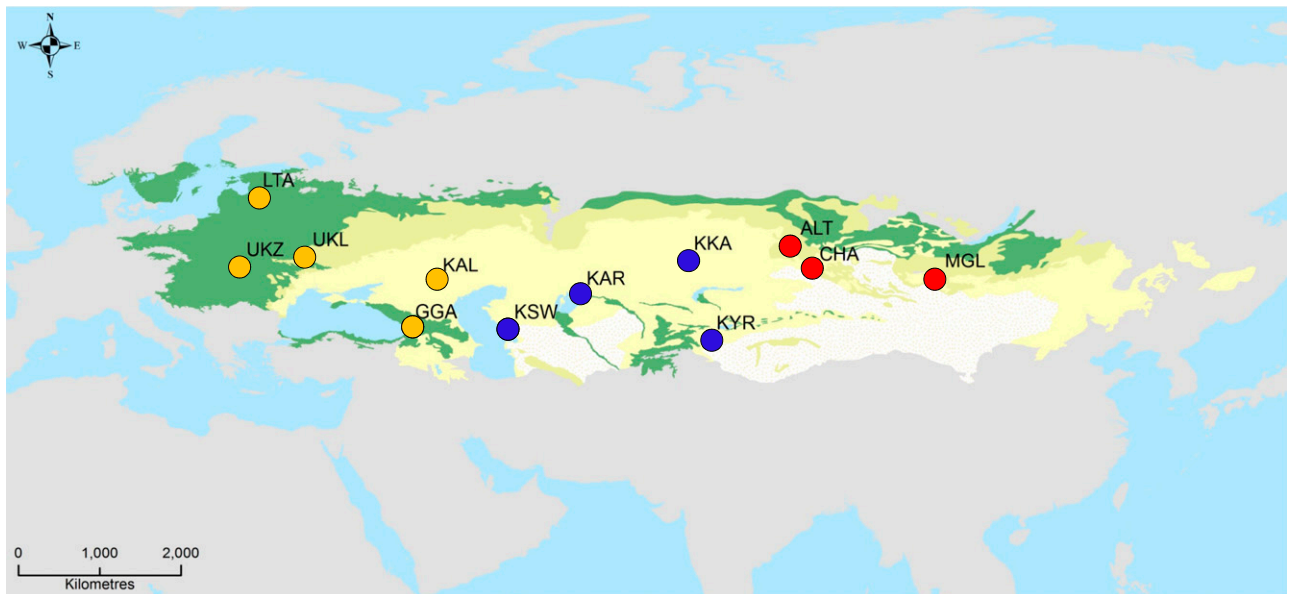

**Fig. S2.** Partitioning of sample populations into the three areas for calculating the summary statistics for ABC: Western Eurasia (orange circles), Central Eurasia (blue circles), and Eastern Eurasia (red circles). See Fig. 1 of the main text for definitions of abbreviations.





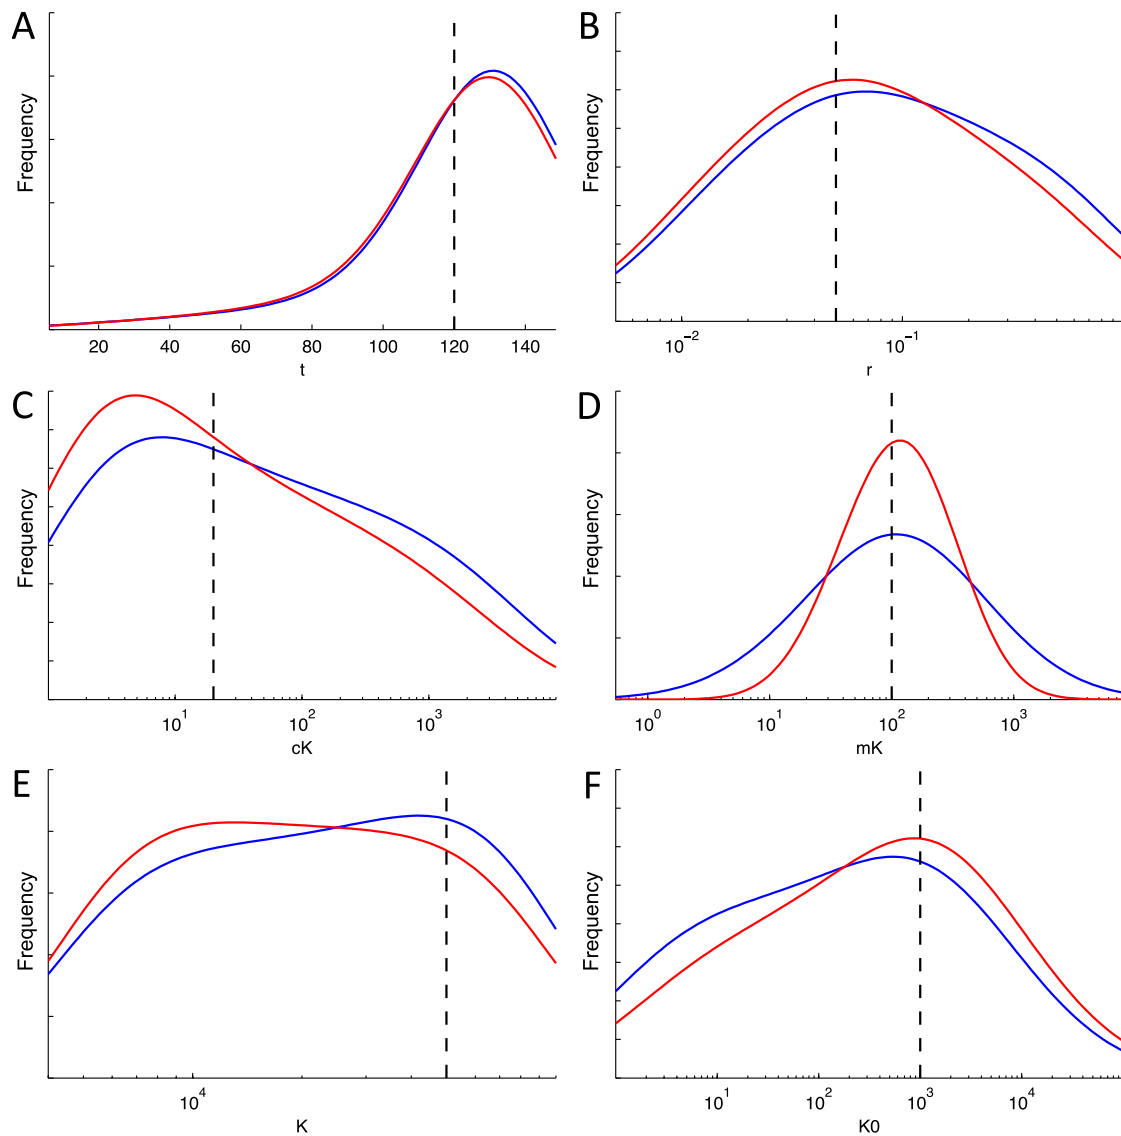

**Fig. S5.** Rejection sampling and posterior distributions from GLM-ABC. Blue curves are marginal distributions from rejection sampling for the model parameters from a uniform parameters sweep, red curves are posterior distributions from GLM-ABC, and the dashed black lines show the parameter values used to produce the synthetic dataset, using the stochastic implementation of the model. (A) Timing,  $t$ , of the expansion; (B) growth rate,  $r$ ; (C) number of colonists,  $cK$ ; (D) number of migrants per generation,  $mK$ ; (E) carrying capacity,  $K$ ; and (F) ancestral carrying capacity,  $K_0$ .

**Table S1. Details of the sampled populations**

| Country    | Region      | ID  | Latitude | Longitude | $d_a$ , km* | $H^\dagger$ | $N^\ddagger$ |
|------------|-------------|-----|----------|-----------|-------------|-------------|--------------|
| Mongolia   | Övörkhangaï | MGL | 48.0     | 101.0     | 1,951       | 0.791       | 44           |
| China      | Xinjiang    | CHA | 48.7     | 87.0      | 3,035       | 0.790       | 34           |
| Russia     | Altai       | ALT | 51.6     | 85.0      | 3,041       | 0.776       | 40           |
| Russia     | Kalmykia    | KAL | 47.5     | 45.3      | 5,833       | 0.778       | 22           |
| Kyrgyzstan | Naryn       | KYR | 41.1     | 75.7      | 4,359       | 0.786       | 20           |
| Kazakhstan | Mangystau   | KSW | 42.3     | 53.2      | 5,687       | 0.769       | 24           |
| Kazakhstan | Kyzylorda   | KAR | 46.0     | 61.3      | 4,997       | 0.769       | 35           |
| Kazakhstan | Karagandy   | KKA | 50.0     | 73.0      | 3,981       | 0.775       | 25           |
| Ukraine    | Lviv        | UKL | 50.3     | 30.9      | 6,359       | 0.782       | 21           |
| Ukraine    | Zakarpattia | UKZ | 49.2     | 23.6      | 6,739       | 0.772       | 18           |
| Lithuania  | Vilnius     | LTA | 56.9     | 25.4      | 6,223       | 0.756       | 21           |
| Georgia    | Samegrelo   | GGA | 42.3     | 42.3      | 6,361       | 0.777       | 24           |

See Fig. 1 for definitions of abbreviations.

\*Distance to the easternmost deme (deme 0), in kilometers.

$^\dagger$ Expected within-population heterozygosity.

$^\ddagger$ Sample size.

**Table S2. Summary statistics for the posterior distributions of each estimated model parameter**

| Parameter    | Mode   | Median | 95% CI* |        | 95% HPD $^\dagger$ |         |
|--------------|--------|--------|---------|--------|--------------------|---------|
|              |        |        | Lower   | Upper  | Lower              | Upper   |
| $T$ , kya    | 160    | 150    | 51      | 180    | 79                 | 180     |
| $r$          | 0.052  | 0.063  | 0.0076  | 0.72   | 0.0078             | 0.69    |
| $cK$         | 7.7    | 28     | 1.2     | 4,000  | 1.0                | 2,300   |
| $mK$         | 1.0    | 1.1    | 0.012   | 59     | 0.02               | 79      |
| $K$          | 54,000 | 39,000 | 7,900   | 94,000 | 11,000             | 100,000 |
| $K_0$        | 950    | 360    | 1.6     | 42,000 | 1.4                | 31,000  |
| $c_d K_d$    | 340    | 180    | 8       | 900    | 15                 | 1,000   |
| $c_{d0} K_d$ | 6.6    | 19     | 1.2     | 640    | 1.0                | 430     |
| $m_d K_d$    | 72     | 72     | 21      | 260    | 21                 | 260     |
| $K_d$        | 6,400  | 4,700  | 1,100   | 9,600  | 1,500              | 10,000  |
| $q$          | 0.47   | 0.46   | 0.04    | 0.91   | 0.01               | 0.88    |

\*Credibility Intervals.

$^\dagger$ Highest posterior density intervals, the shortest continuous intervals with an integrated posterior density of a certain value.

**Table S3. List of microsatellite loci amplified in two multiplex PCR reactions**

| Locus  | ECA* | Primer 5'–3'                                            | Reference | Size range | Multiplex |
|--------|------|---------------------------------------------------------|-----------|------------|-----------|
| VHL20  | 30   | CAAGTCCTCTTACTTGAAGACTAG<br>AACTCAGGGAGAATCTTCTCA       | (1)       | 82–102     | 1         |
| HTG4   | 9    | CTATCTCAGTCTTGATTGCAGGAC<br>GCTCCCTCCCTCCCTCTGTTCTC     | (2)       | 123–137    | 1         |
| AHT4   | 24   | AACCGCCTGAGCAAGGAAGT<br>GCTCCAGAGAGTTTACCTT             | (3)       | 151–169    | 1         |
| HMS7   | 1    | CAGGAACTCTCATGTTGATACCATC<br>GTGTTGTTGAAACATACCTTGACTGT | (4)       | 172–186    | 1         |
| COR18  | 25   | AGTCTGGCAATATTGAGGATGT<br>AGCAGCTACCCCTTGAATACTG        | (5)       | 263–277    | 1         |
| AHT5   | 8    | ACGGACACATCCCTGCCTGC<br>GCAGGCTAAGGAGGCTCAGC            | (3)       | 125–141    | 1         |
| HMS6   | 4    | CTCCATCTTGTGAAGTGAACCTCA<br>GAAGCTGCCAGTATCAACCATTG     | (4)       | 159–171    | 1         |
| ASB23  | 3    | ACATCCTGGTCAAATCAGATCC<br>GAGGGCAGCAGGTTGGGAAGG         | (6)       | 183–215    | 1         |
| TKY312 | 6    | AACCTGGGTTTCTGTTGTTG<br>GATCCTTCTTTTATGGCTG             | (7)       | 100–126    | 1         |
| TKY343 | 11   | TAGTCCCTATTTCTCCTGAG<br>AAACCCACAGATACTCTAGA            | (8)       | 143–173    | 1         |
| LEX33  | 4    | TTAATCAAAGGATTCAGTTG<br>GGGACACTTCTTTACTTTC             | (9)       | 191–217    | 1         |
| HMS3   | 9    | CCAACTTTGTACATAACAAGA<br>GCCATCCTCACTTTTCACTTTGTT       | (10)      | 151–171    | 1         |
| COR58  | 12   | CACCAGGCTAAGTAGCCAAG<br>GGGAAGGACGATGAGTGAC             | (10)      | 210–234    | 1         |
| HMS5   | 5    | TAGTGTATCCGTCAGACTTCAAGG<br>GCAAGGAAGTCAGACTCCTGGA      | (4)       | 98–104     | 2         |
| EB2E8  | 26   | TTCTGTGTTAGGGGTTGTG<br>GTATGAGCCAGTCTTGAT               | (11)      | 125–139    | 2         |
| TKY321 | 20   | TTGTTGGGTTTAGGTATGAAGG<br>GTGTCAATGTGACTTCAAGAAC        | (7)       | 182–208    | 2         |
| ASB2   | 15   | CACTAAGTGTCTGTTTCAGAAGG<br>GCACAAGTGTCTCTGATAGG         | (6)       | 216–248    | 2         |
| TKY301 | 23   | AATGGTGGCTAATCAATGGG<br>GTGTATGATGCCCTCATCTC            | (7)       | 149–169    | 2         |
| TKY337 | 4    | AGCAGGGTTTAATTACCGAG<br>TAGATGCTAATGCAGCACAG            | (8)       | 169–189    | 2         |
| TKY374 | 1    | CTGGTCCCTCTGGATGGAAG<br>TCCCAAGAGGGAGTACAATC            | (7)       | 197–225    | 2         |
| HTG7   | 4    | CCTGAAGCAGAACATCCCTCCTTG<br>ATAAAGTGTCTGGCAGAGCTGCT     | (12)      | 113–123    | 2         |
| UM11   | 20   | TGAAAGTAGAAAGGGATGTGG<br>GTCTCAGAGCAGAAGTCCCTG          | (13)      | 162–184    | 2         |
| TKY394 | 24   | GCATCATCGCCTTGAAGTTG<br>CCTTCTGGTTGGTATCCTG             | (8)       | 232–258    | 2         |
| UM32   | 14   | AAATGGTCAGCCTCTCCTC<br>TGTCTCTAGTCCCCTCCTC              | (14)      | 140–150    | 2         |
| HMS1   | 15   | CATCACTTTCATGTCTGCTTGG<br>TTGACATAAATGCTTATCCTATGGC     | (4)       | 170–182    | 2         |
| TKY294 | 27   | GATCTATGTGCTAGCAAACAC<br>CTAGTGTTTCAGATAGCCTC           | (7)       | 216–230    | 2         |

\**Equus caballus* chromosome number.

- van Haeringen H, Bowling AT, Stott ML, Lenstra JA, Zwaagstra KA (1994) A highly polymorphic horse microsatellite locus: VHL20. *Anim Genet* 25:207.
- Ellegren H, Johansson M, Sandberg K, Andersson L (1992) Cloning of highly polymorphic microsatellites in the horse. *Anim Genet* 23:133–142.
- Binns MM, Holmes NG, Holliman A, Scott AM (1995) The identification of polymorphic microsatellite loci in the horse and their use in thoroughbred parentage testing. *Br Vet J* 151: 9–15.
- Guérin G, Bertaud M, Amigues Y (1994) Characterization of seven new horse microsatellites: HMS1, HMS2, HMS3, HMS5, HMS6, HMS7 and HMS8. *Anim Genet* 25:62.
- Hopman TJ, et al. (1999) Equine dinucleotide repeat loci COR001–COR020. *Anim Genet* 30:225–226.
- Breen M, et al. (1997) Genetical and physical assignments of equine microsatellites—first integration of anchored markers in horse genome mapping. *Mamm Genome* 8:267–273.
- Tozaki T, et al. (2001a) Population study and validation of paternity testing for Thoroughbred horses by 15 microsatellite loci. *J Vet Med Sci* 63:1191–1197.
- Tozaki T, et al. (2001b) Characterization of equine microsatellites and microsatellite-linked repetitive elements (eMLREs) by efficient cloning and genotyping methods. *DNA Res* 8: 33–45.

9. Coogle L, Reid R, Bailey E (1996) Equine dinucleotide repeat loci from LEX025 to LEX033. *Anim Genet* 27:289–290.
10. Ruth LS, et al. (1999) Equine dinucleotide repeat loci COR041-COR060. *Anim Genet* 30:320–321.
11. Gralak B, Zurkowski M, Niemczewski C, Coppieters W (1994) The preliminary study on linkage between two horse microsatellites and genes coding for blood groups and some blood proteins. *Anim Genet* 25:285–286.
12. Marklund S, Ellegren H, Eriksson S, Sandberg K, Andersson L (1994) Parentage testing and linkage analysis in the horse using a set of highly polymorphic microsatellites. *Anim Genet* 25:19–23.
13. Meyer AH, Valberg SJ, Hillers KR, Schweitzer JK, Mickelson JR (1997) Sixteen new polymorphic equine microsatellites. *Anim Genet* 28:69–70.
14. Swinburne J, et al. (2000) First comprehensive low-density horse linkage map based on two 3-generation, full-sibling, cross-bred horse reference families. *Genomics* 66:123–134.
